# Supplementary material for: Carbon Monoxide Production during Bio-Waste Composting under Different Temperature and Aeration Regimes
Source: MDPI journal article supplement (doi:10.3390/ma16134551), 2023-06-23
Supplement: s1 [file s1]

Table S1. Properties of composts from different temperature variants  $\pm$  st. dev.; d.m. – dry matter

| Process T,<br>°C | Aeration<br>rate, L·h <sup>-1</sup> | pH                    | EC,<br>mS·cm <sup>-1</sup> | TOC, %<br>d.m.      | TN, %<br>d.m.      | C/N | Water<br>content,<br>% | LOI, %<br>d.m.      | NH <sub>4</sub> -N,<br>mg·kg<br>d.m. <sup>-1</sup> | NO <sub>3</sub> -N,<br>mg·kg<br>d.m. <sup>-1</sup> | AT <sub>4</sub> ,<br>mg O <sub>2</sub> :g<br>d.m. <sup>-1</sup> |
|------------------|-------------------------------------|-----------------------|----------------------------|---------------------|--------------------|-----|------------------------|---------------------|----------------------------------------------------|----------------------------------------------------|-----------------------------------------------------------------|
| 35               | 2.7                                 | 8.43<br>$\pm$<br>0.07 | 2.65 $\pm$<br>0.02         | 33.46 $\pm$<br>0.01 | 1.75 $\pm$<br>0.00 | 19  | 56.20 $\pm$<br>1.09    | 63.51 $\pm$<br>0.25 | 12.90 $\pm$<br>0.48                                | 27.97 $\pm$<br>13.08                               | 13.0 $\pm$ 0.3                                                  |
|                  | 3.4                                 | 8.41<br>$\pm$<br>0.02 | 2.63 $\pm$<br>0.03         | 33.19 $\pm$<br>0.09 | 1.81 $\pm$<br>0.02 | 18  | 55.31 $\pm$<br>1.58    | 63.04 $\pm$<br>0.07 | 14.32 $\pm$<br>0.32                                | 38.37 $\pm$<br>18.19                               | 12.9 $\pm$ 0.1                                                  |
|                  | 4.8                                 | 8.51<br>$\pm$<br>0.03 | 2.67 $\pm$<br>0.04         | 32.62 $\pm$<br>0.03 | 1.75 $\pm$<br>0.01 | 19  | 51.55 $\pm$<br>0.03    | 62.39 $\pm$<br>0.22 | 11.24 $\pm$<br>0.44                                | 25.26 $\pm$<br>7.14                                | 12.9 $\pm$ 0.9                                                  |
|                  | 7.8                                 | 8.60<br>$\pm$<br>0.05 | 2.69 $\pm$<br>0.01         | 32.56 $\pm$<br>0.05 | 1.85 $\pm$<br>0.01 | 18  | 54.02 $\pm$<br>4.47    | 61.09 $\pm$<br>0.25 | 9.67 $\pm$ 0.46                                    | 19.46 $\pm$<br>7.53                                | 12.7 $\pm$ 0.1                                                  |
| 45               | 2.7                                 | 5.26<br>$\pm$<br>0.02 | 4.95 $\pm$<br>0.03         | 35.30 $\pm$<br>0.15 | 1.65 $\pm$<br>0.00 | 20  | 56.23 $\pm$<br>0.05    | 63.18 $\pm$<br>0.52 | 1461.07 $\pm$<br>0.16                              | 74.54 $\pm$<br>10.49                               | 71.9 $\pm$ 3.1                                                  |
|                  | 3.4                                 | 7.38<br>$\pm$<br>0.03 | 4.55 $\pm$<br>0.03         | 32.37 $\pm$<br>1.03 | 1.75 $\pm$<br>0.03 | 19  | 56.06 $\pm$<br>0.30    | 62.30 $\pm$<br>0.19 | 821.07 $\pm$<br>39.14                              | 57.63 $\pm$<br>13.21                               | 33.7 $\pm$ 3.7                                                  |
|                  | 4.8                                 | 7.42<br>$\pm$<br>0.02 | 4.04 $\pm$<br>0.02         | 33.81 $\pm$<br>0.47 | 1.83 $\pm$<br>0.06 | 17  | 51.57 $\pm$<br>1.02    | 60.58 $\pm$<br>0.02 | 649.90 $\pm$<br>11.83                              | 80.99 $\pm$<br>4.68                                | 40.7 $\pm$ 1.1                                                  |
|                  | 7.8                                 | 7.46<br>$\pm$<br>0.01 | 3.52 $\pm$<br>0.01         | 33.17 $\pm$<br>0.22 | 1.77 $\pm$<br>0.03 | 18  | 49.91 $\pm$<br>0.98    | 61.14 $\pm$<br>0.19 | 457.19 $\pm$<br>11.43                              | 47.31 $\pm$<br>11.57                               | 37.5 $\pm$ 3.1                                                  |
| 55               | 2.7                                 | 8.30<br>$\pm$<br>0.01 | 2.49 $\pm$<br>0.01         | 32.03 $\pm$<br>0.38 | 1.71 $\pm$<br>0.03 | 19  | 47.54 $\pm$<br>0.99    | 60.84 $\pm$<br>0.46 | 390.86 $\pm$<br>12.12                              | 28.00 $\pm$<br>8.89                                | 36.0 $\pm$ 0.8                                                  |
|                  | 3.4                                 | 8.29<br>$\pm$<br>0.01 | 2.39 $\pm$<br>0.01         | 31.69 $\pm$<br>0.01 | 1.85 $\pm$<br>0.05 | 17  | 41.45 $\pm$<br>1.02    | 58.42 $\pm$<br>1.38 | 137.69 $\pm$<br>5.44                               | 86.58 $\pm$<br>3.99                                | 16.0 $\pm$ 0.8                                                  |
|                  | 4.8                                 | 8.25<br>$\pm$<br>0.03 | 2.28 $\pm$<br>0.03         | 31.33 $\pm$<br>0.71 | 1.73 $\pm$<br>0.00 | 18  | 38.78 $\pm$<br>0.78    | 60.20 $\pm$<br>0.16 | 140.44 $\pm$<br>1.04                               | 24.02 $\pm$<br>7.63                                | 9.8 $\pm$ 0.6                                                   |
|                  | 7.8                                 | 8.29<br>$\pm$<br>0.01 | 2.39 $\pm$<br>0.03         | 30.21 $\pm$<br>0.25 | 1.86 $\pm$<br>0.02 | 16  | 38.55 $\pm$<br>0.68    | 59.54 $\pm$<br>0.03 | 72.15 $\pm$<br>3.69                                | 21.25 $\pm$<br>3.80                                | 13.7 $\pm$ 1.1                                                  |
| 65               | 2.7                                 | 7.53<br>$\pm$<br>0.08 | 2.84 $\pm$<br>0.01         | 36.00 $\pm$<br>0.21 | 1.94 $\pm$<br>0.04 | 19  | 59.30 $\pm$<br>1.44    | 66.84 $\pm$<br>0.47 | 265.36 $\pm$<br>9.38                               | 10.07 $\pm$<br>2.78                                | 24.6 $\pm$ 0.1                                                  |
|                  | 3.4                                 | 7.53<br>$\pm$<br>0.05 | 2.88 $\pm$<br>0.00         | 35.94 $\pm$<br>0.10 | 2.02 $\pm$<br>0.02 | 18  | 50.74 $\pm$<br>1.16    | 67.69 $\pm$<br>0.17 | 194.42 $\pm$<br>6.45                               | 3.25 $\pm$ 00                                      | 20.7 $\pm$ 0.4                                                  |
|                  | 4.8                                 | 7.74<br>$\pm$<br>0.01 | 2.56 $\pm$<br>0.04         | 35.81 $\pm$<br>1.16 | 1.87 $\pm$<br>0.07 | 19  | 51.34 $\pm$<br>0.11    | 67.57 $\pm$<br>0.92 | 95.25 $\pm$<br>1.31                                | 25.17 $\pm$<br>2.47                                | 18.6 $\pm$ 1.1                                                  |
|                  | 7.8                                 | 7.81<br>$\pm$<br>0.02 | 2.55 $\pm$<br>0.03         | 35.17 $\pm$<br>0.14 | 2.02 $\pm$<br>0.06 | 17  | 55.33 $\pm$<br>0.76    | 66.62 $\pm$<br>0.38 | 114.77 $\pm$<br>0.00                               | 18.23 $\pm$<br>5.22                                | 32.1 $\pm$ 0.7                                                  |
